# Supplementary material for: Visualizing anatomically registered data with brainrender
Source: eLife journal article supplement (doi:10.7554/elife.65751), 2021-03-19
Supplement: supp [file elife_poa_e65751_Table_3_source_data_1.xlsx]

## Sheet: Sheet 1
Test	Machine	GPU	# actors	# vertices	FPS	run duration
10k cells	1	yes	3	1029324	24.76	0.81
	2	No	3	1029324	22.46	1.16
	3	No	3	1029324	20.00	1.41
	4	Yes	3	1029324	100.00	1.34
100k cells	1	yes	3	9849324	18.87	3.23
	2	No	3	9849324	14.91	4.34
	3	No	3	9849324	0.43	7.94
	4	Yes	3	9849324	1.20	1.13
1M cells	1	yes	3	98049324	2.65	31.01
	2	No	3	98049324	2.55	96.49
	3	No	3	98049324	0.03	86.75
	4	Yes	3	98049324	0.13	36.57
Slicing 10k cells	1	yes	3	237751	37.64	0.96
	2	No	3	237751	39.10	1.25
	3	No	3	237751	26.32	1.88
	4	Yes	3	237751	200.00	1.34
Slicing 100k cells	1	yes	3	276092	31.79	7.77
	2	No	3	276092	25.98	9.09
	3	No	3	276092	21.28	16.88
	4	Yes	3	276092	111.11	9.65
Slicing 1M cells	1	yes	3	275069	11.23	91.31
	2	No	3	275069	5.39	104.79
	3	No	3	275069	5.03	158.99
	4	Yes	3	275069	37.04	97.43
brain regions	1	yes	1678	1864388	9.38	11.78
	2	No	1678	1864388	7.61	27.40
	3	No	1678	1864388	6.49	46.79
	4	Yes	1678	1864388	11.90	35.83
animation	1	yes	8	96615	9.91	18.98
	2	No	8	96615	22.12	12.63
	3	No	8	96615	15.15	11.92
	4	Yes	8	96615	47.62	12.29
volume	1	yes	12	49324	1.79	2.31
	2	No	12	49324	1.66	1.95
	3	No	12	49324	3.55	2.15
	4	Yes	12	49324	23.26	1.21
